# Supplementary material for: A Comparative Study of Oleuropein Extraction from Wild Olive Leaves (Olea europea subsp. oleaster, Hoffmanns. & Link), Its Gastrointestinal Stability, and Biological Potential
Source: MDPI journal article supplement (doi:10.3390/app14020869), 2024-01-19
Supplement: s1 [file s1]

SUPPLEMENTARY MATERIAL

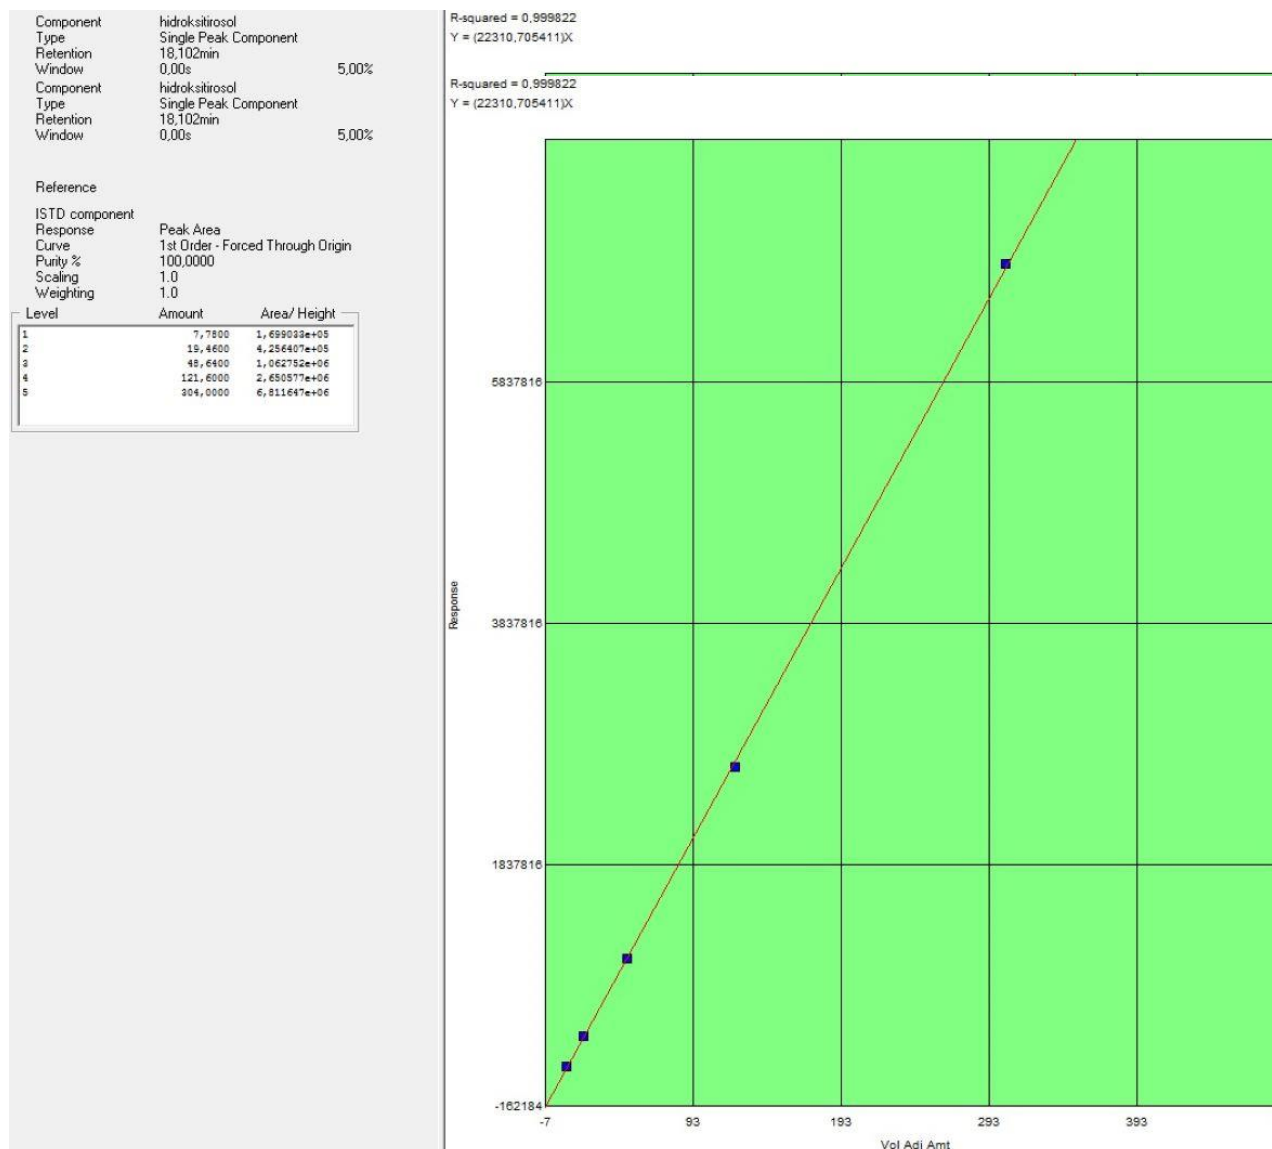

**Supplemental Figure S1a.** Calibration curve of **hydroxytyrosol**; amount was expressed in  $\mu\text{g/mL}$ .

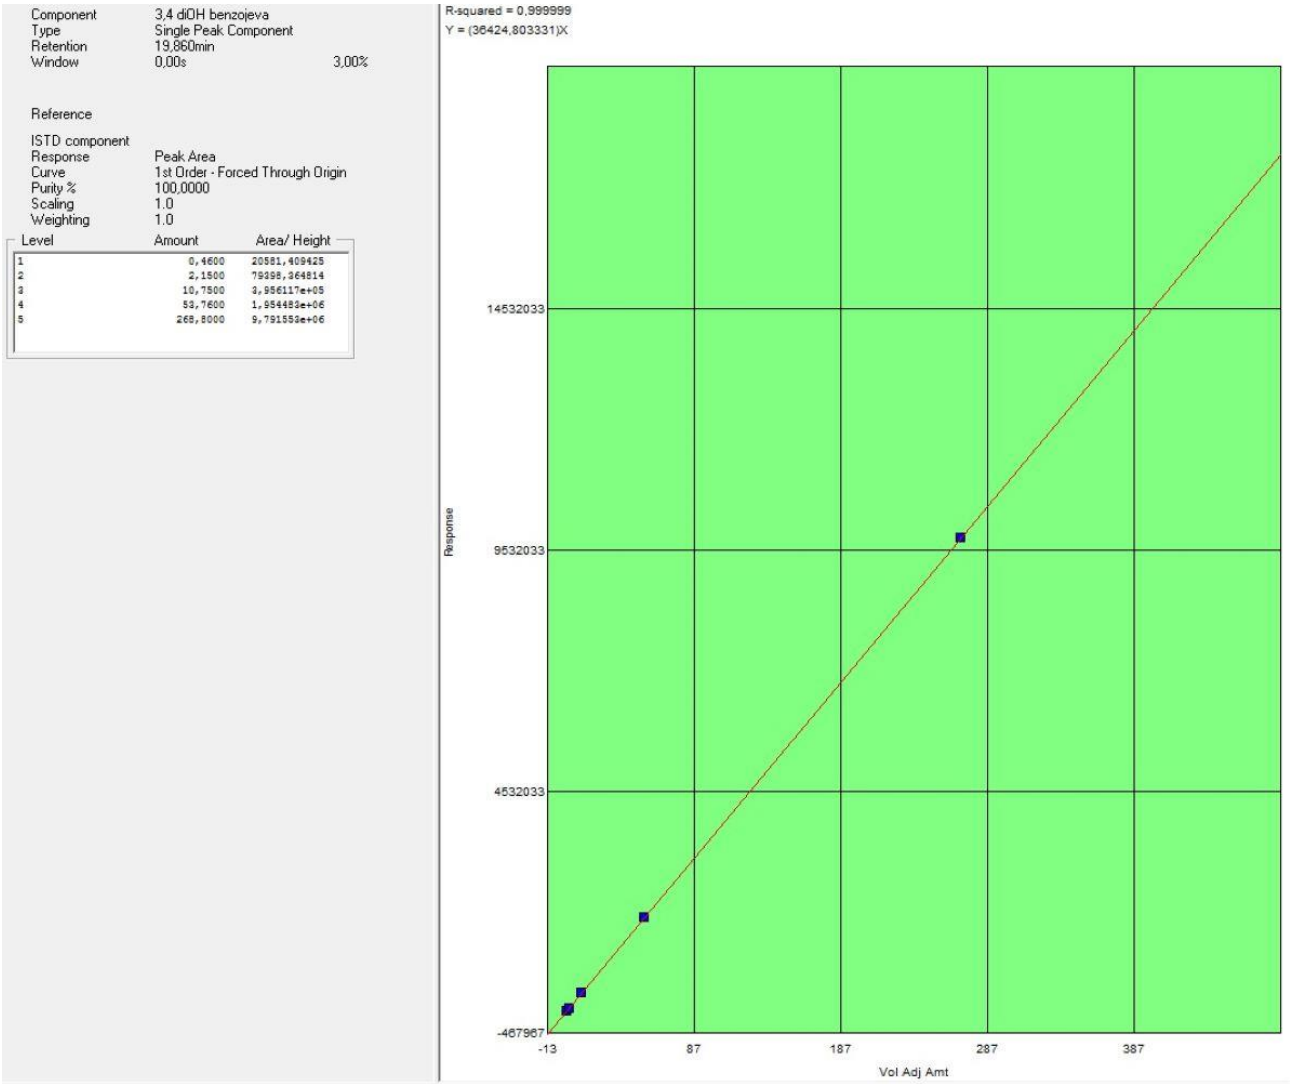

Supplemental Figure S1b. Calibration curve of 3,4-hydroxybenzoic acid; amount was expressed in µg/mL.

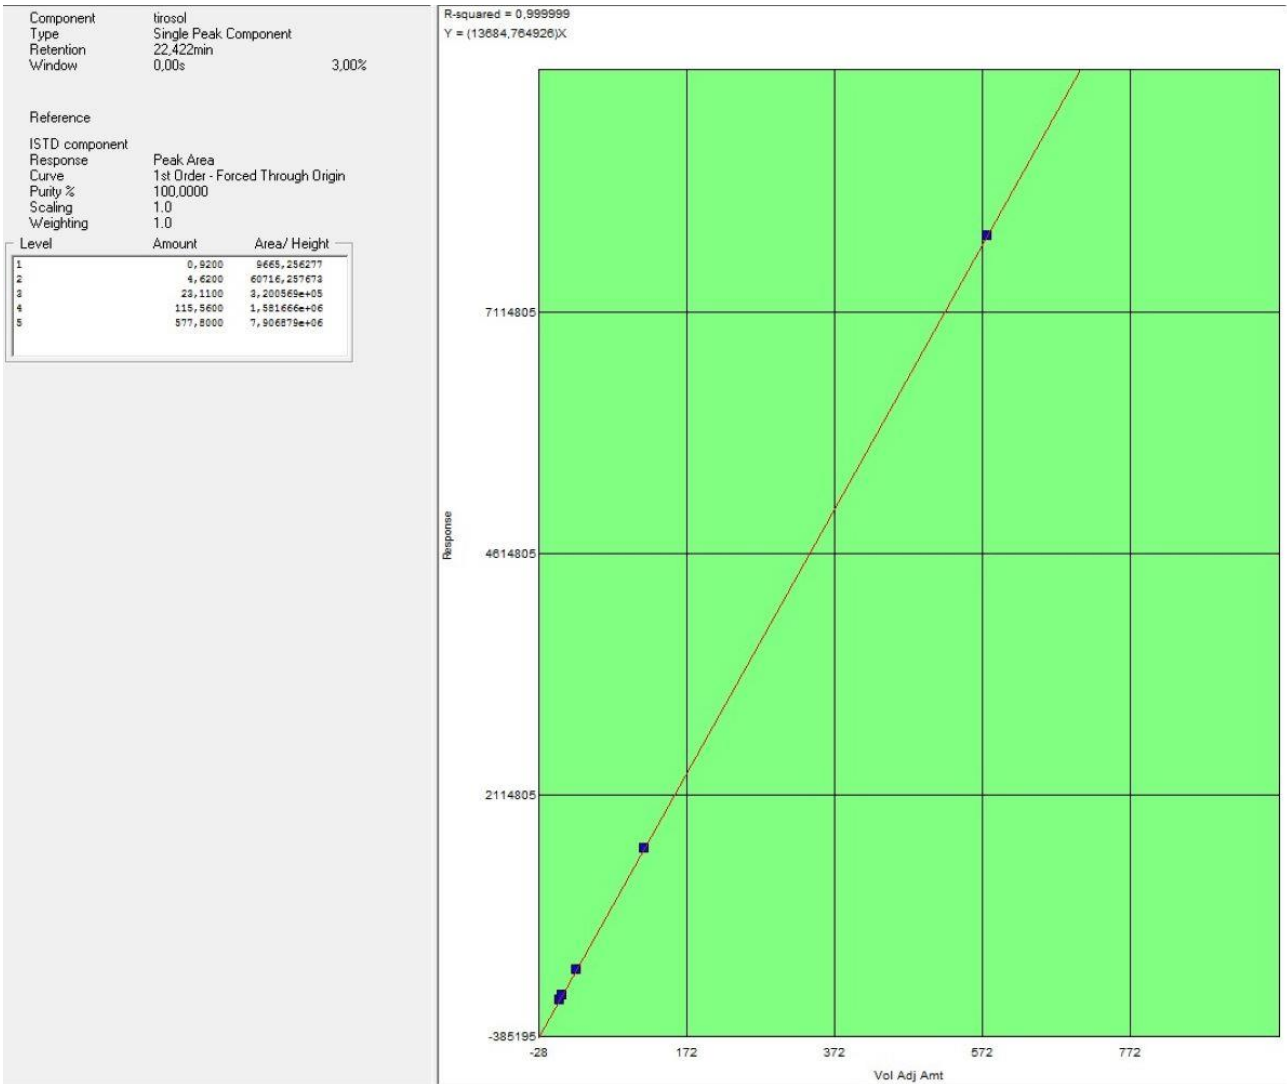

Supplemental Figure S1c. Calibration curve of **tyrosol**; amount was expressed in µg/mL

22

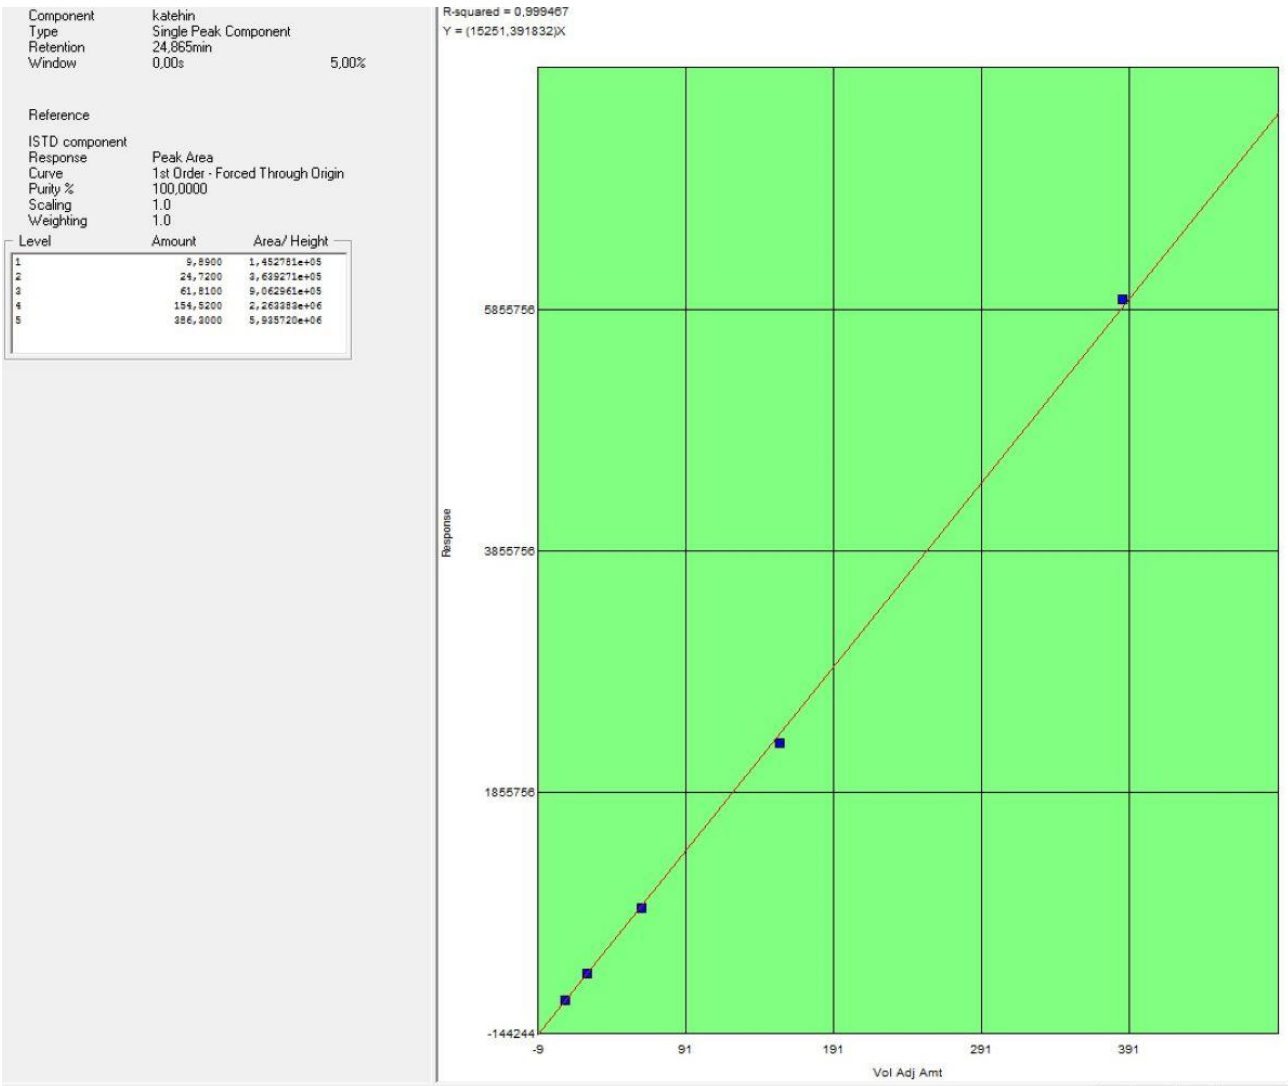

Supplemental Figure S1d. Calibration curve of catechin; amount was expressed in µg/mL

23  
24  
25  
26

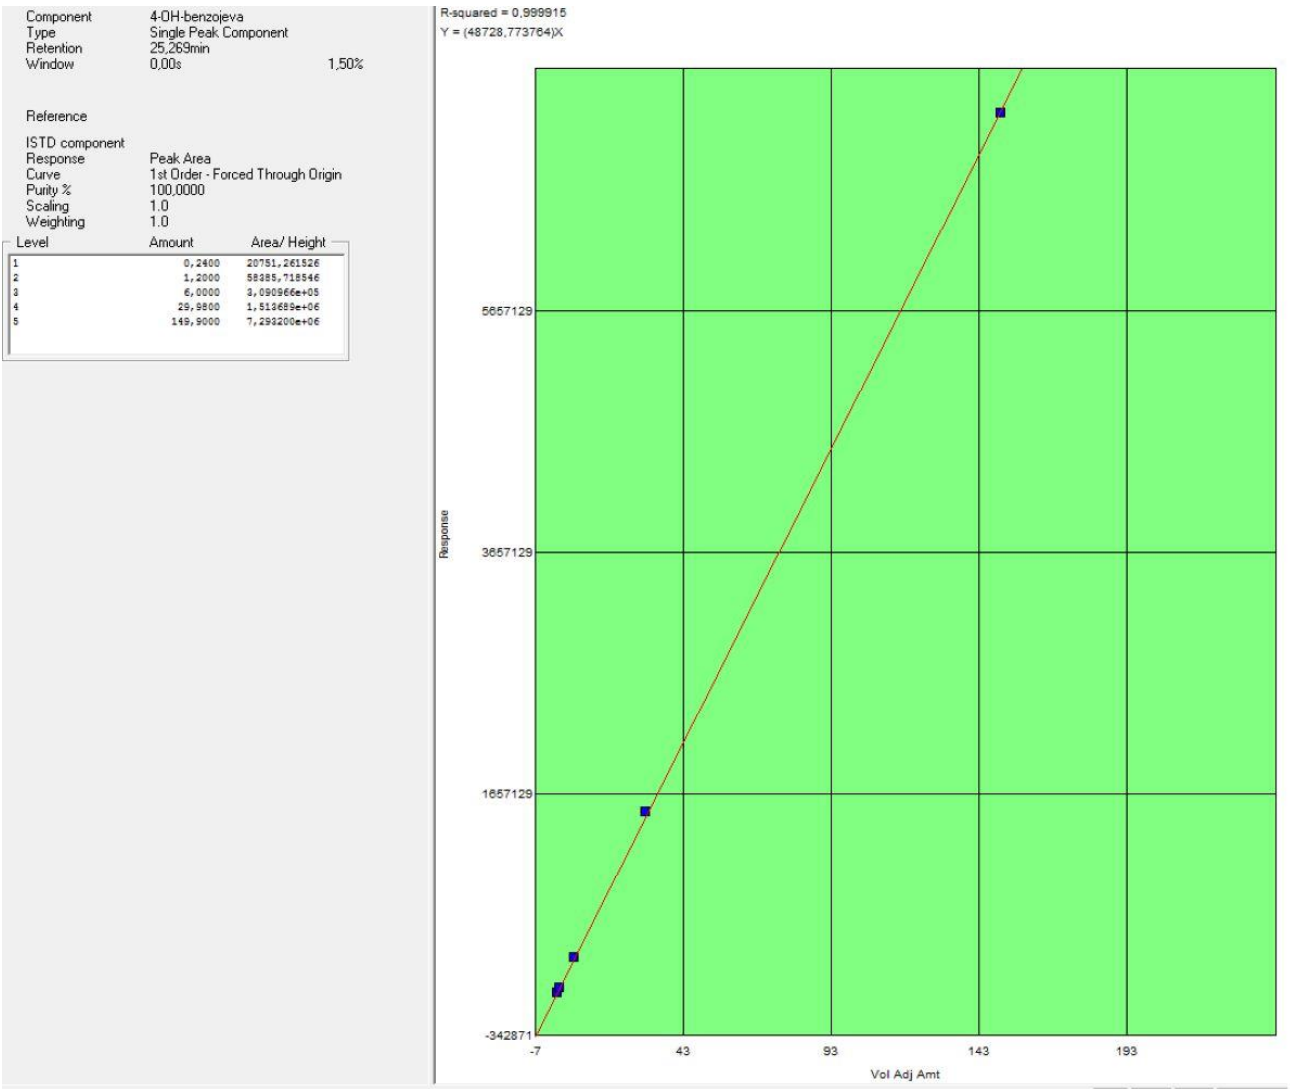

Supplemental Figure S1e. Calibration curve of 4-hydroxybenzoic acid; amount was expressed in µg/mL

27  
28  
29

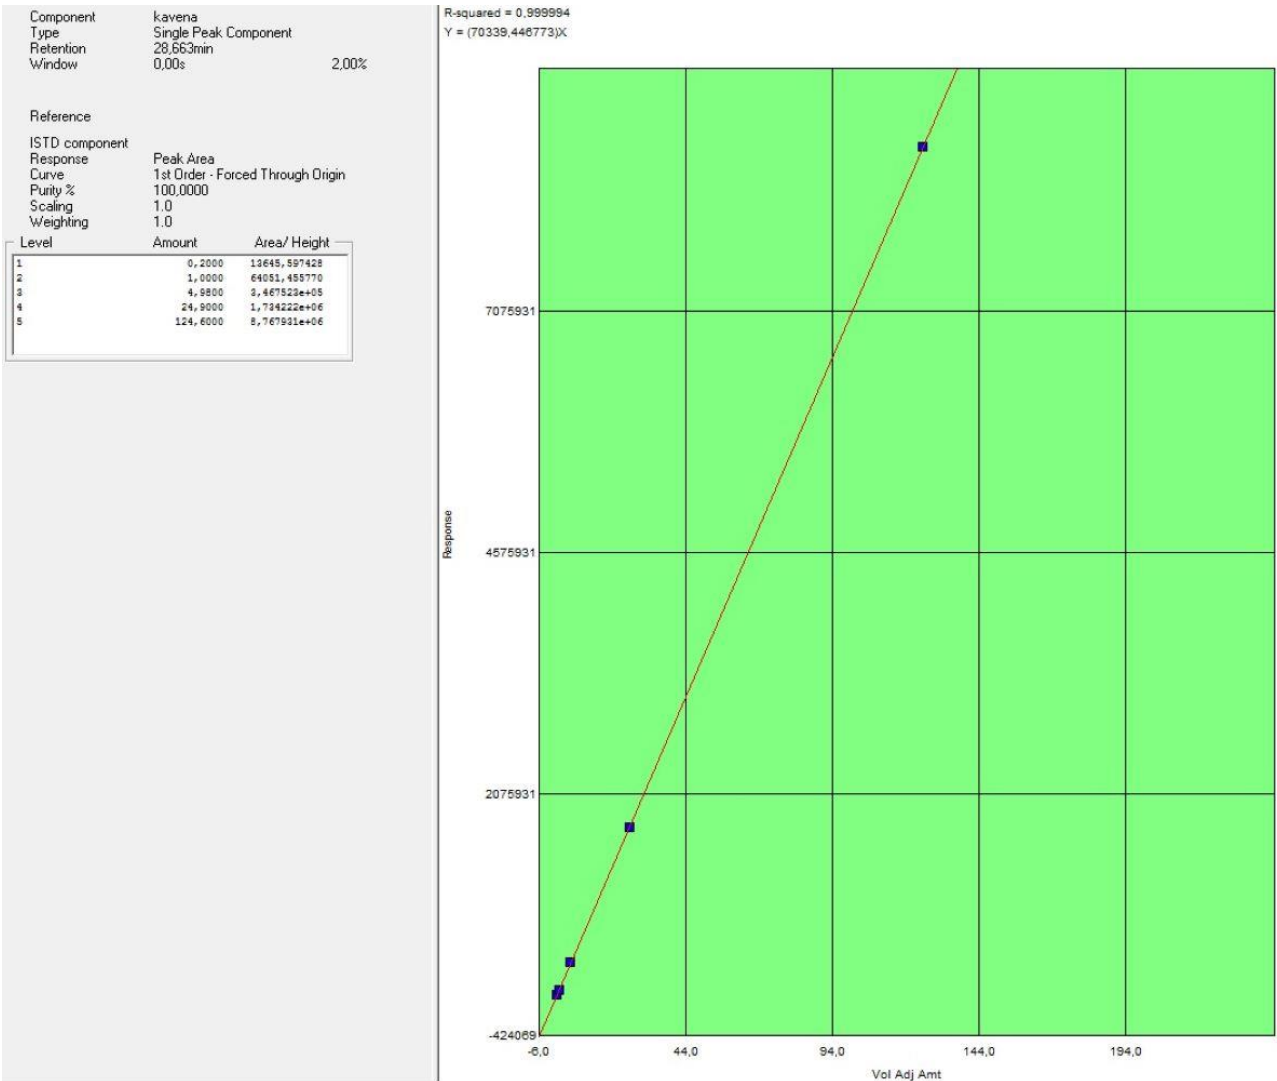

Supplemental Figure S1f. Calibration curve of **coffe acid**; amount was expressed in µg/mL

30  
31  
32

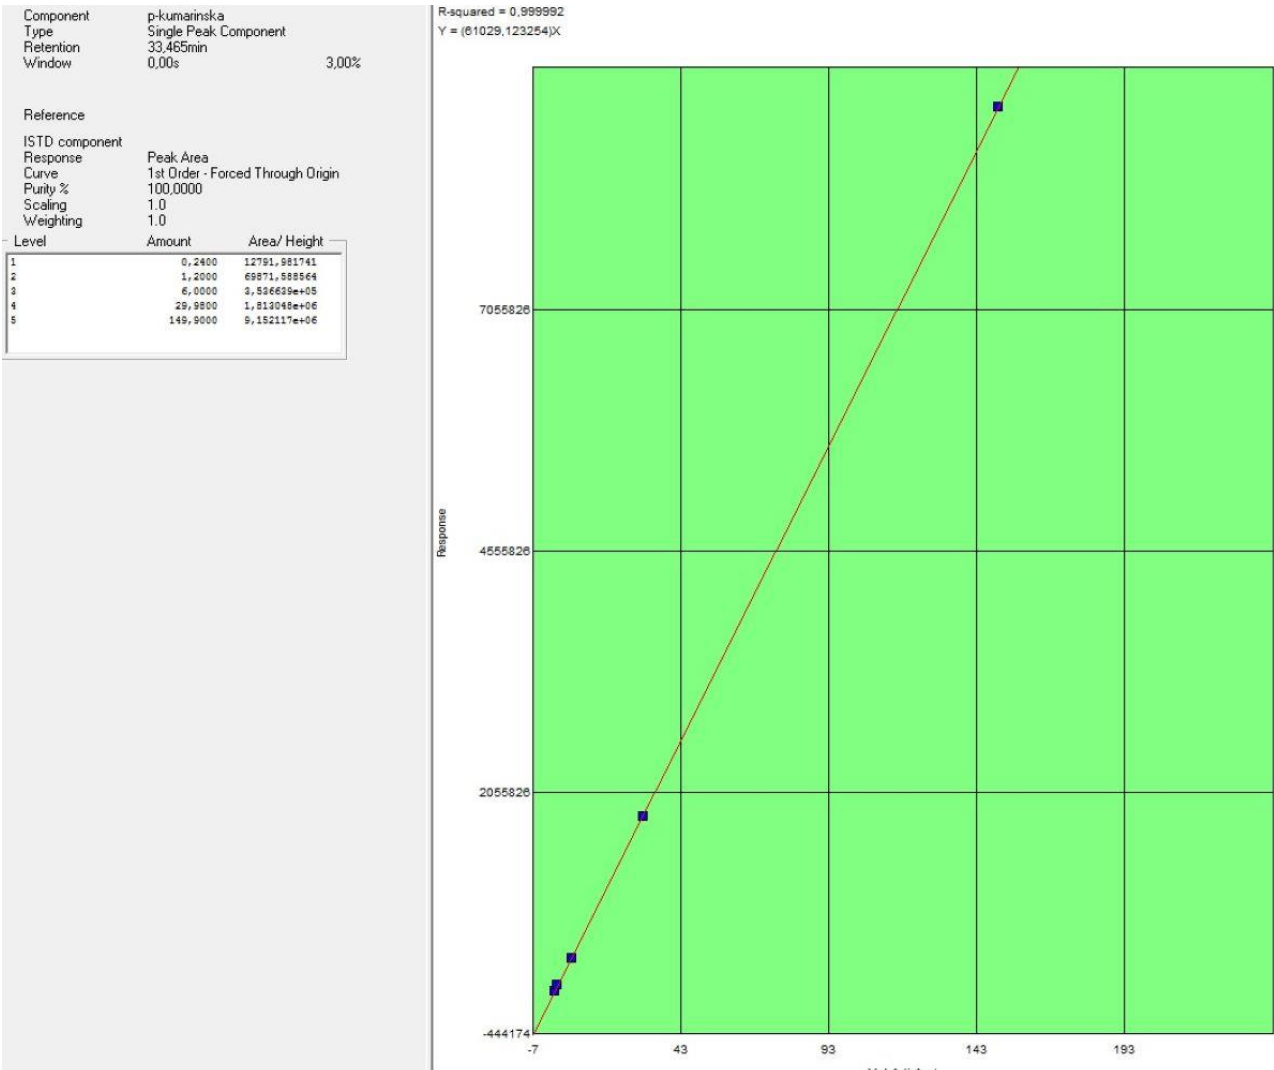

Supplemental Figure S1g. Calibration curve of *p*-coumaric acid; amount was expressed in µg/mL.

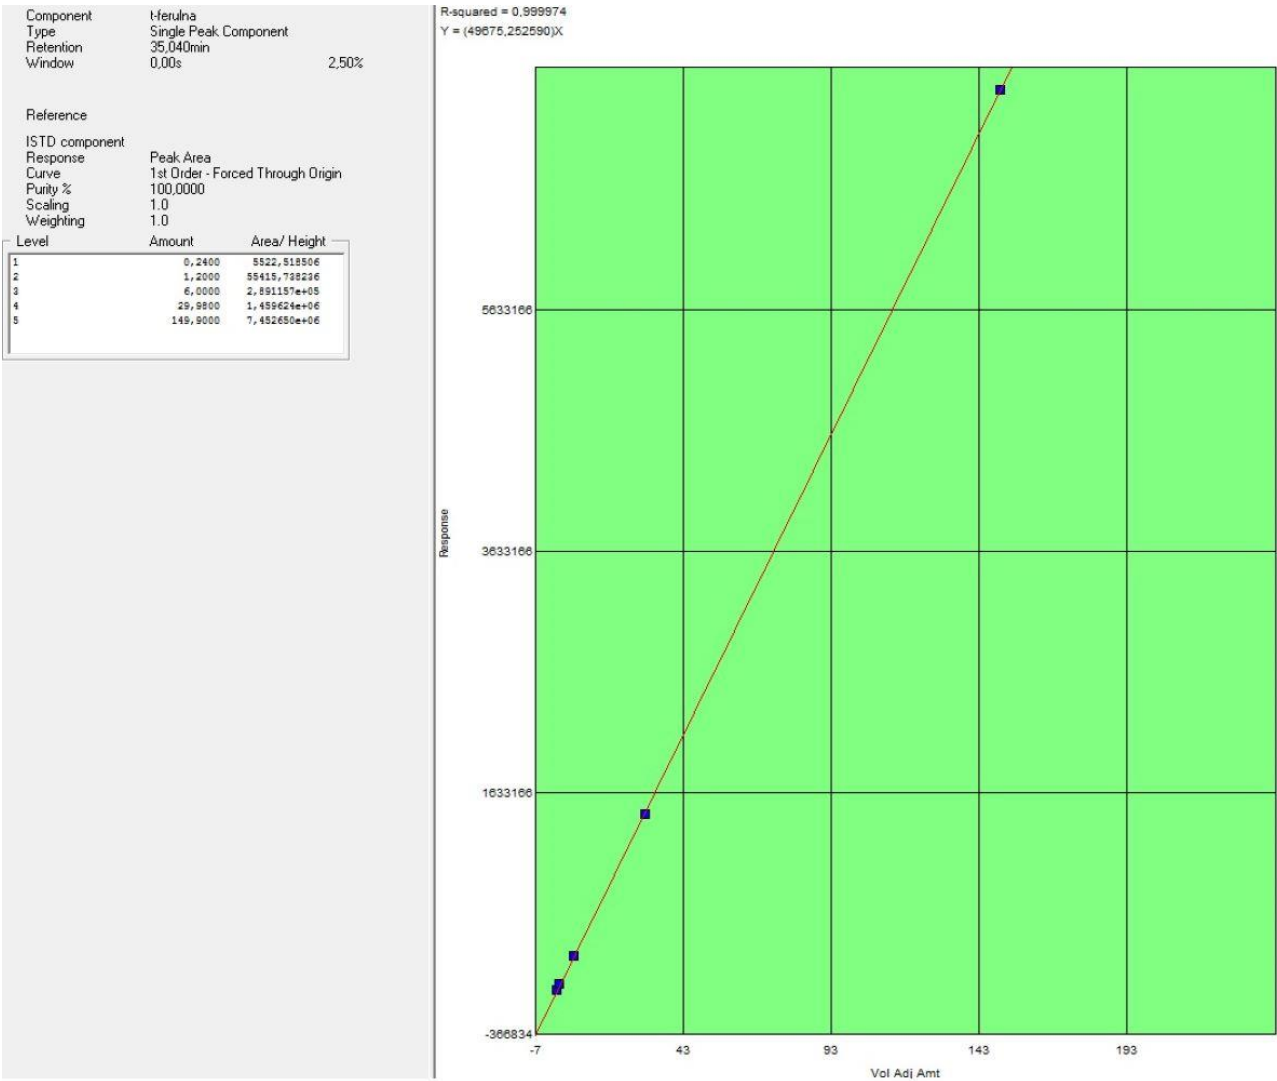

Supplemental Figure S1h. Calibration curve of *t*-ferulic acid; amount was expressed in µg/mL.

36  
37  
38



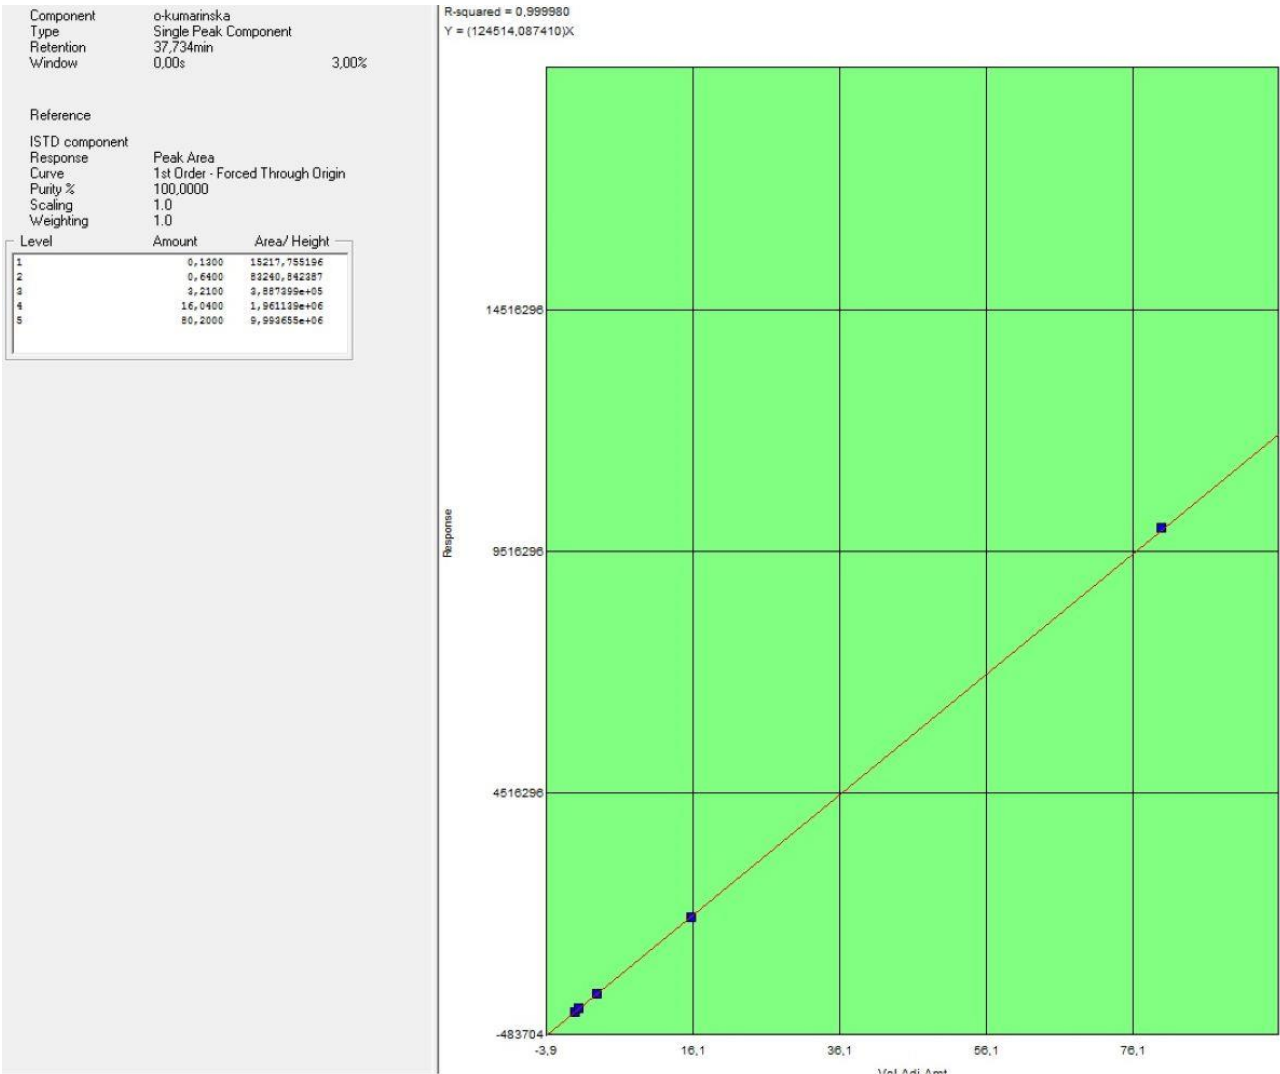

Supplemental Figure S1i. Calibration curve of *o*-coumaric acid; amount was expressed in µg/mL.

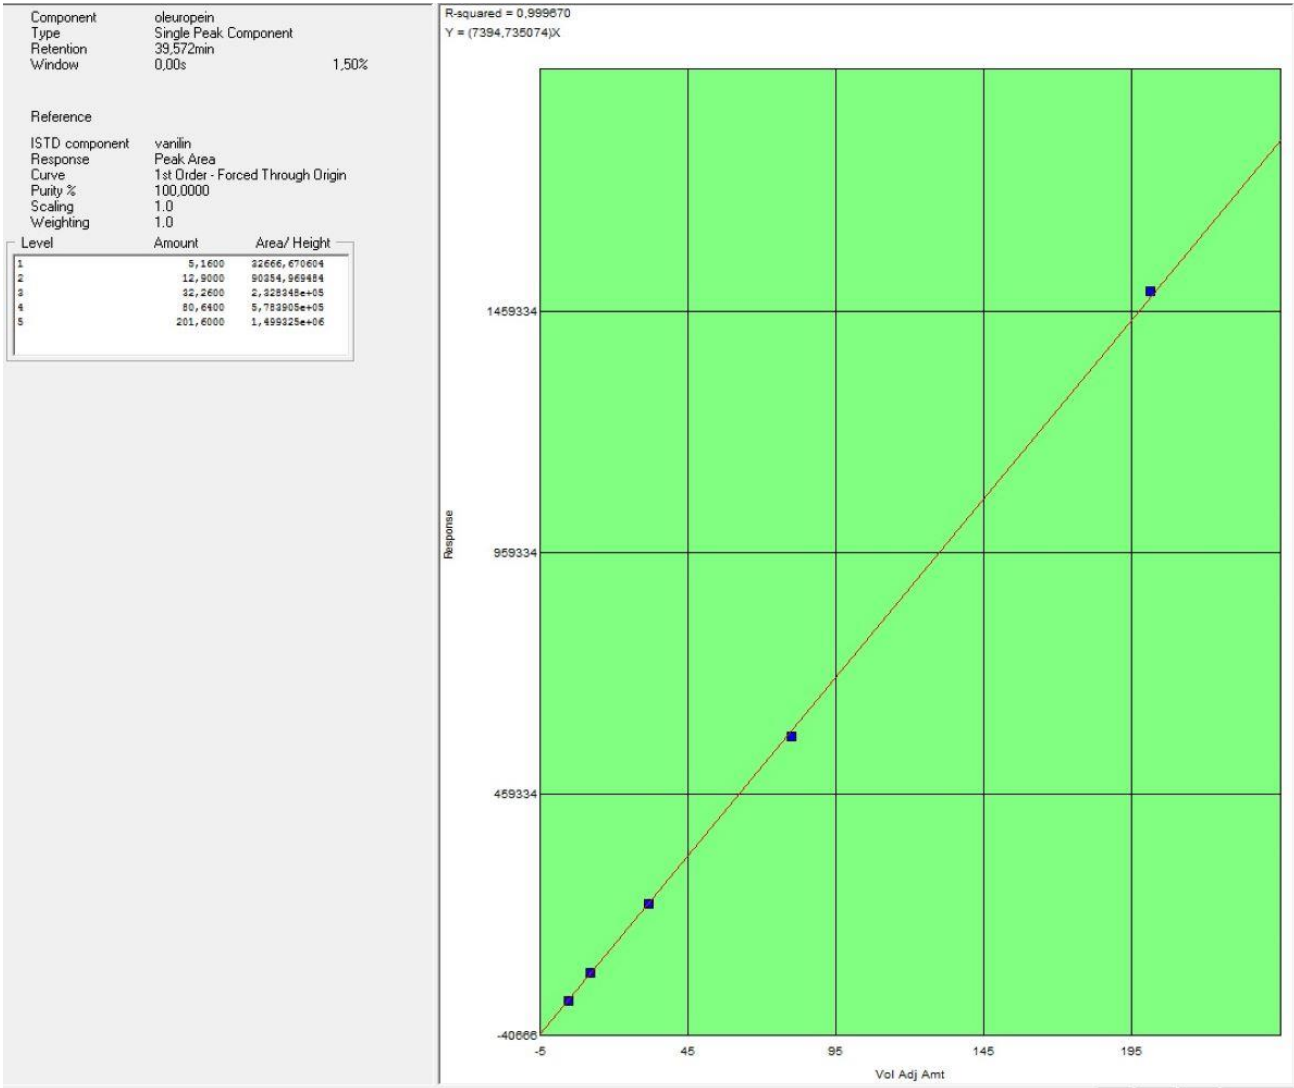

Supplemental Figure S1j. Calibration curve of **oleuropein**; amount was expressed in µg/mL.

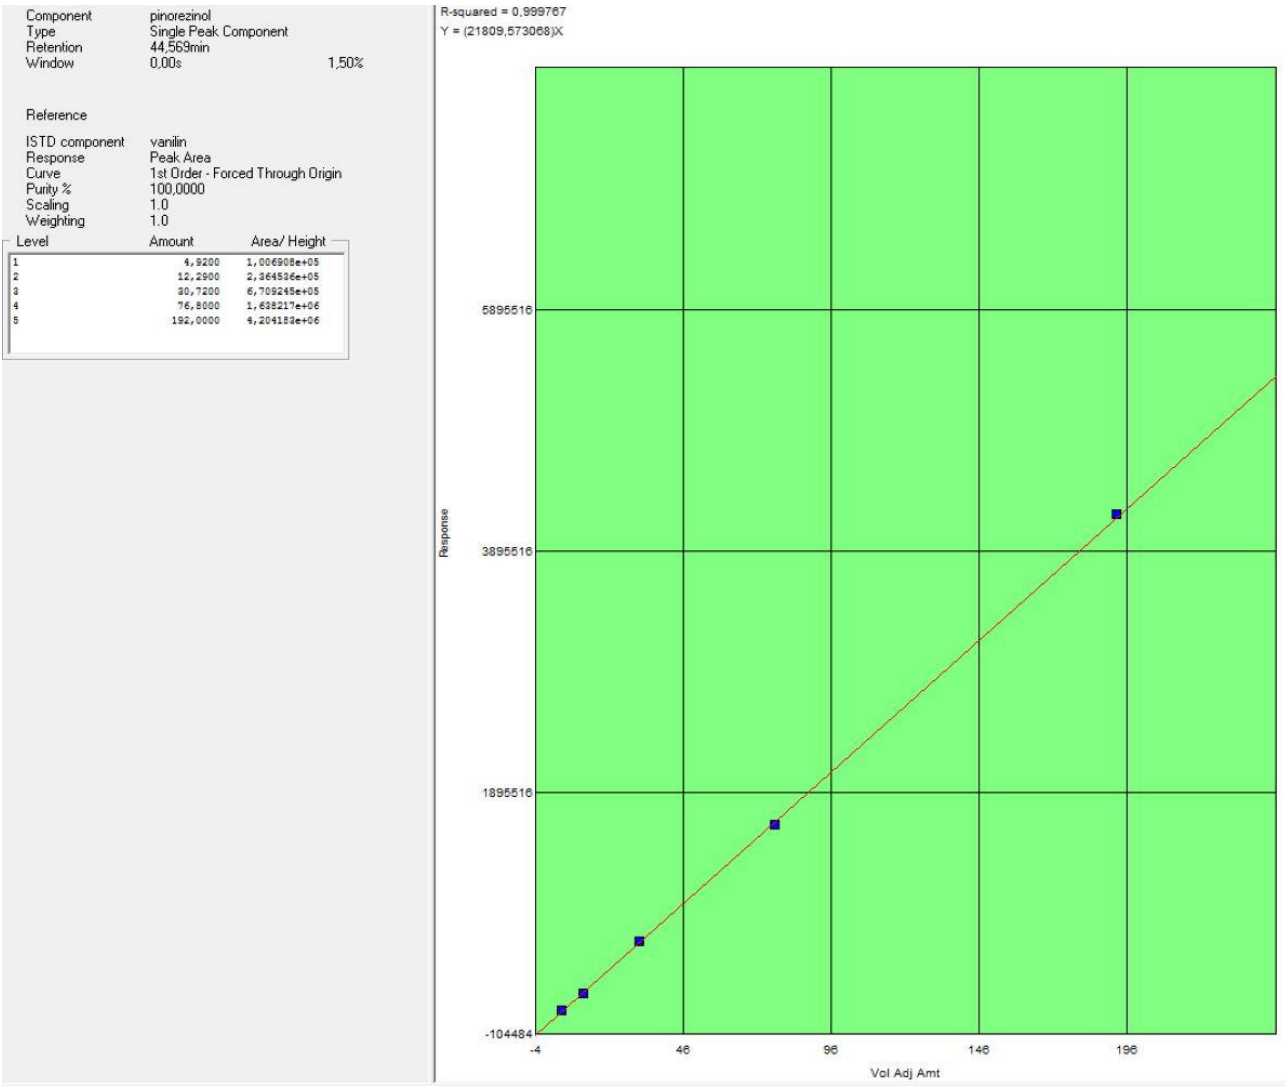

Supplemental Figure S1k. Calibration curve of **pinorezinol**; amount was expressed in  $\mu\text{g/mL}$ .

44  
45  
46

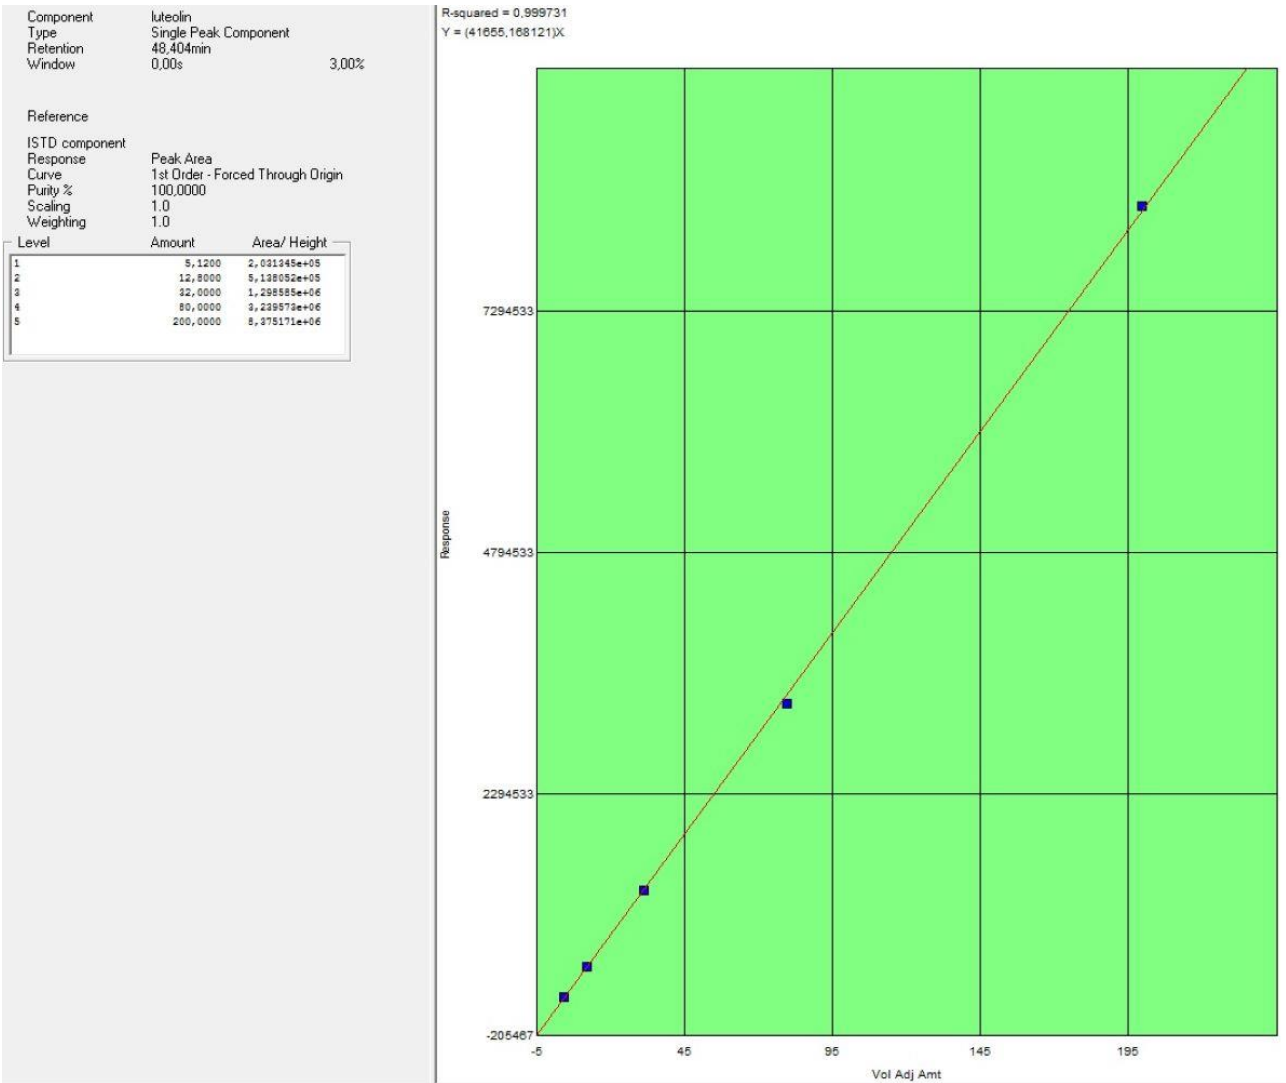

Supplemental Figure S11. Calibration curve of luteoline; amount was expressed in µg/mL.

47  
48  
49

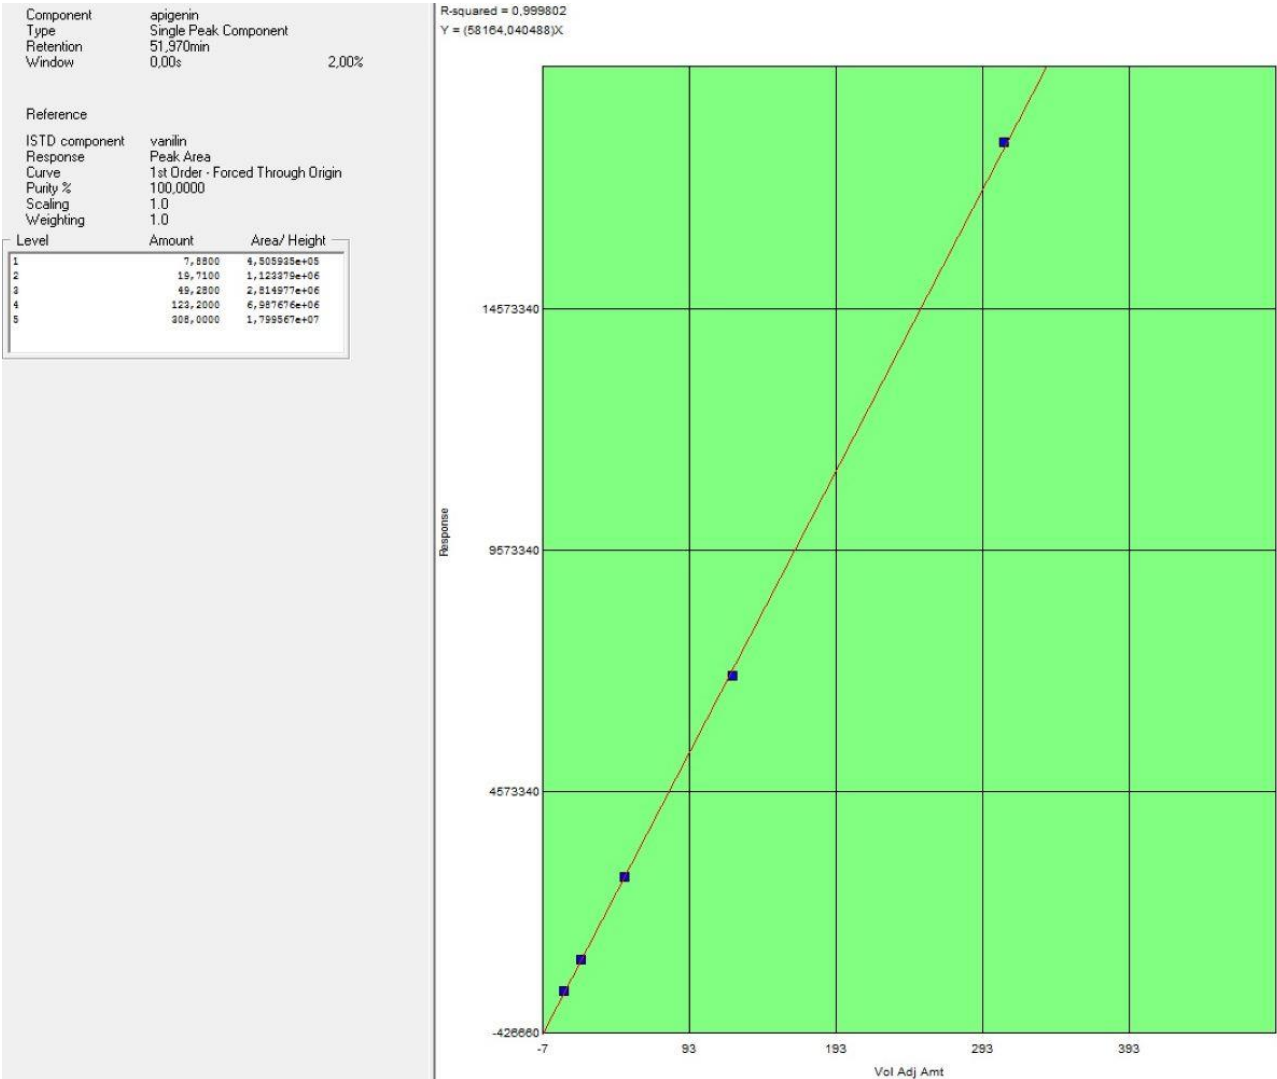

Supplemental Figure S1m. Calibration curve of **apigenine**; amount was expressed in µg/mL-

50  
51  
52

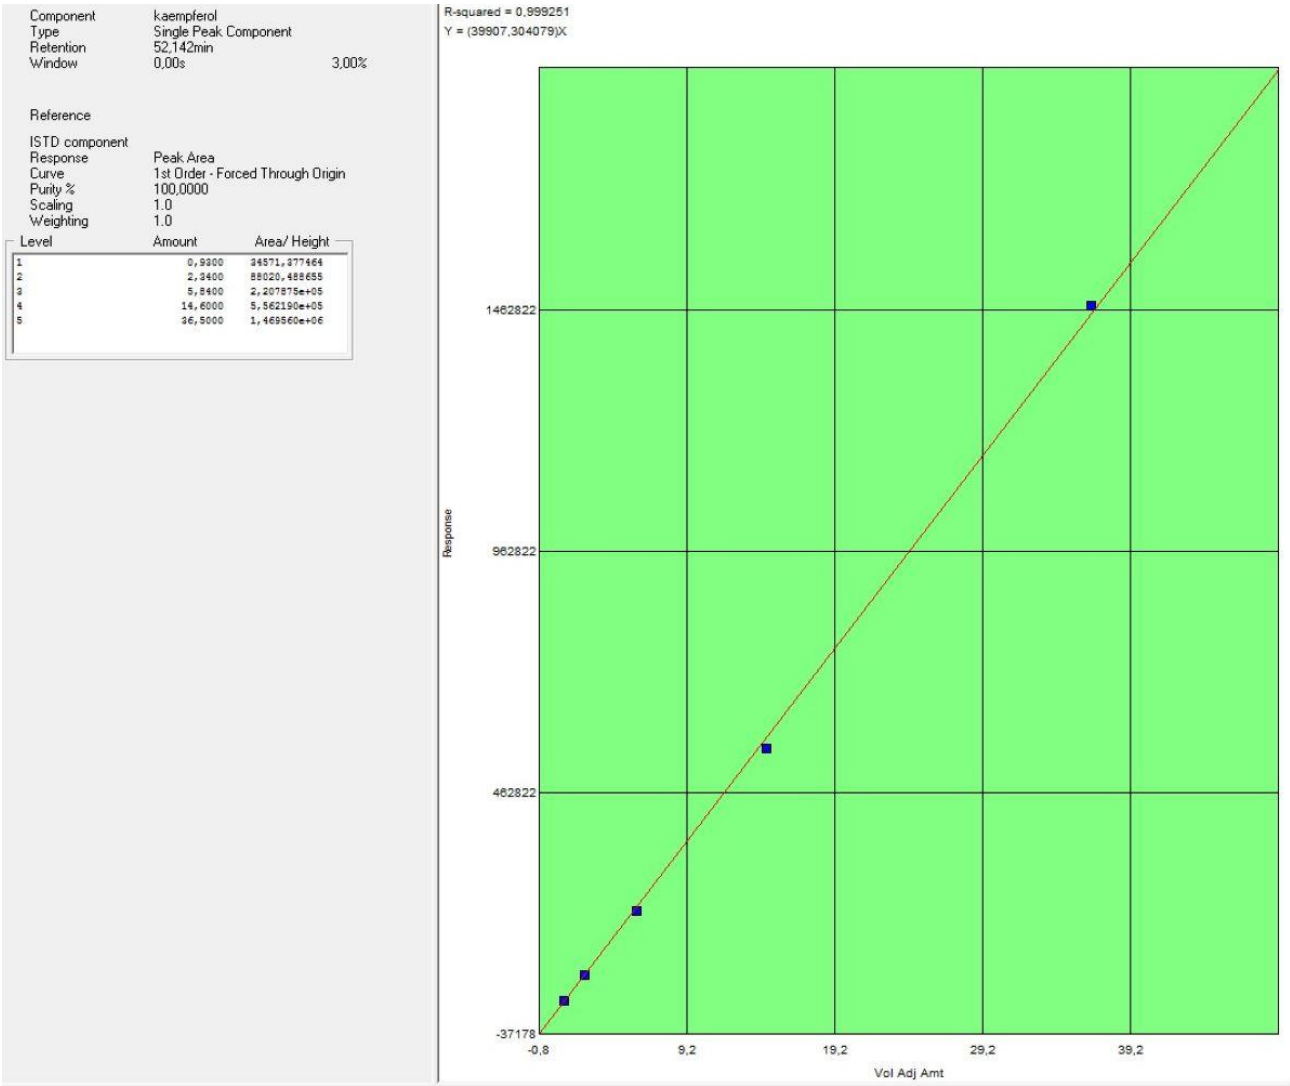

Supplemental Figure S1n. Calibration curve of **kaempferol**; amount was expressed in  $\mu\text{g/mL}$ .
